# Supplementary material
Source: PubMed Central journal article supplement (PMC7156963)
Supplement: EMBJ-39-e104120-s001.pdf [file EMBJ-39-e104120-s001.pdf]

## **Appendix**

Contents:

Appendix Figure S1. Sequence alignment of PTAR1 orthologues.

Appendix Figure S2. Purification and analysis of PTAR1 and Ykt6 mutants.

Appendix Table S1. Data collection and refinement statistics.

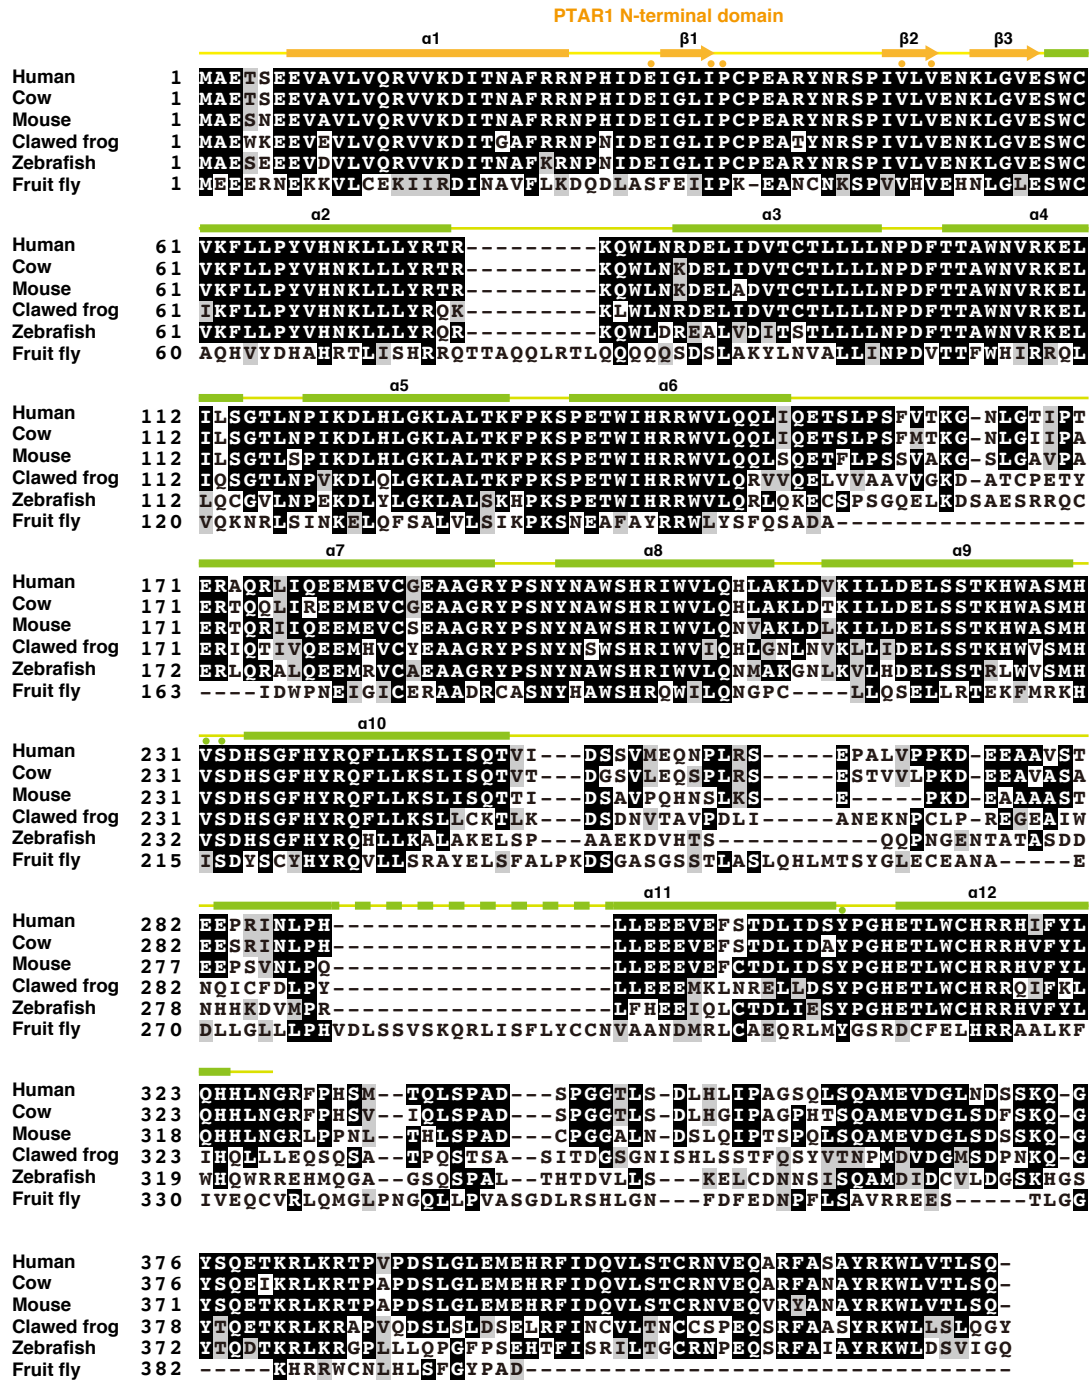

**Appendix Figure S1. Sequence alignment of PTAR1 orthologues.**

Amino acid sequence alignment of PTAR1 orthologues using Clustal Omega. Identical residues are shaded in black and similar residues are shaded in gray. The secondary structure elements of the human PTAR1 (residues 1–327) are shown above the alignment. Residues whose side chain is involved in the interaction with Ykt6 are labeled with an orange circle (site 1) and a green circle (site 2). Human, Homo sapiens XP\_005252033; Cow, Bos taurus XP\_005210075; Mouse, Mus musculus NP\_082484; Clawed frog, Xenopus laevis NP\_001106898; Zebrafish, Danio rerio NP\_001123546; Fruit fly, Drosophila melanogaster NP\_569992.

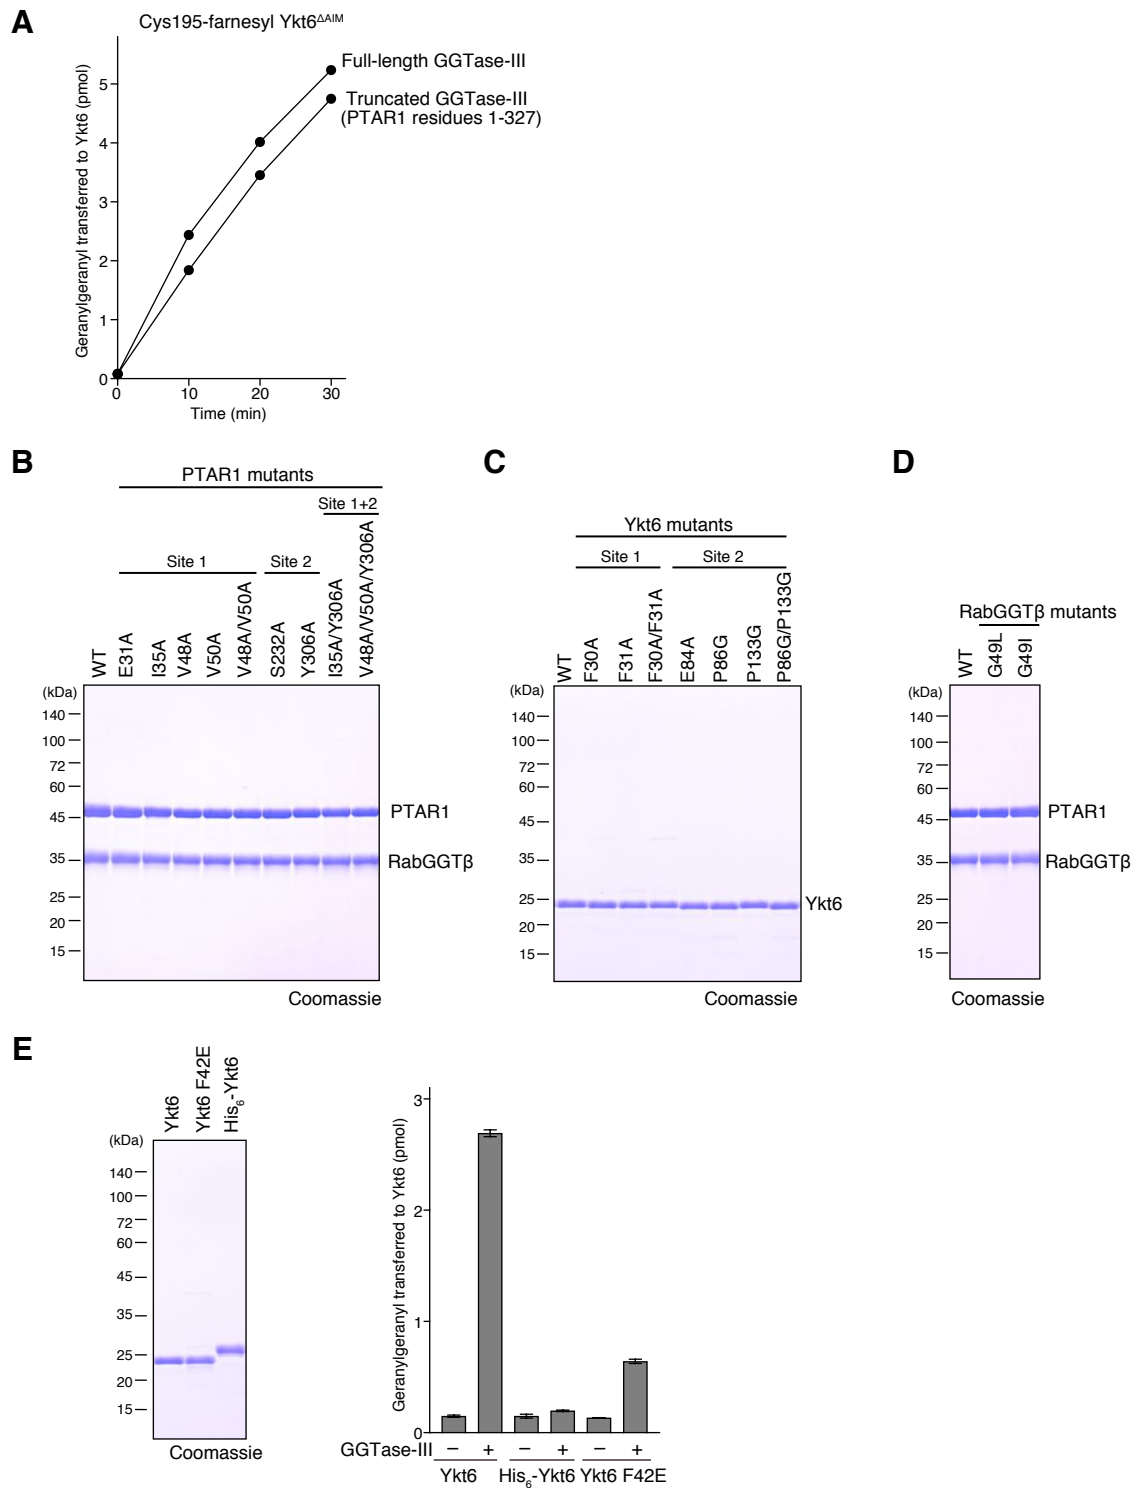

**Appendix Figure S2. Purification and analysis of GGTase-III and Ykt6 mutants.**

- A Geranylgeranylation activity of truncated GGTase-III (PTAR1 residues 1–327) purified from *E. coli* (100 nM) and full-length GGTase-III purified from Sf9 insect cells (100 nM). Cys195-farnesyl Ykt6<sup>ΔAIM</sup> (5 μM) and <sup>3</sup>H-GGPP (1 μM) were used as substrates.
- B SDS-PAGE and Coomassie staining analysis of purified GGTase-III mutants consisting of mutant PTAR1 and WT RabGGTβ.
- C SDS-PAGE and Coomassie staining analysis of purified Ykt6 mutants.
- D SDS-PAGE and Coomassie staining analysis of purified GGTase-III mutants consisting of WT PTAR1 and the G49L or G49I mutant of RabGGTβ.
- E Left, SDS-PAGE and Coomassie staining analysis of purified untagged Ykt6, untagged Ykt6 F42E mutant, and N-terminally His<sub>6</sub>-tagged Ykt6. Right, geranylgeranylation of untagged Ykt6, His<sub>6</sub>-Ykt6, and untagged Ykt6 F42E mutant by GGTase-III. Ykt6 proteins (5 μM) were incubated with or without GGTase-III (100 nM) and <sup>3</sup>H-GGPP (1 μM) for 30 min at 37°C, and the amount of <sup>3</sup>H-geranylgeranyl transferred to Ykt6 was quantified by scintillation counting (mean ± SEM, *n* = 3).

**Appendix Table S1. Data collection and refinement statistics.**

| Molecule name                                       | Apo-GGTase-III             | GGTase-III–Ykt6                          | GGTase-III–Cys195-farnesyl Ykt6–GGPP     | GGTase-III–Cys194-geranylgeranyl, Cys195-farnesyl Ykt6 <sup>ΔAIM</sup> –PPi |
|-----------------------------------------------------|----------------------------|------------------------------------------|------------------------------------------|-----------------------------------------------------------------------------|
| PDB ID                                              | 6J6X                       | 6J74                                     | 6J7X                                     | 6J7F                                                                        |
| <b>Data collection</b>                              |                            |                                          |                                          |                                                                             |
| Beamline                                            | SPring-8<br>BL41XU         | SPring-8<br>BL41XU                       | SPring-8<br>BL41XU                       | SPring-8<br>BL41XU                                                          |
| Space group                                         | <i>P</i> 6 <sub>5</sub> 22 | <i>P</i> 4 <sub>1</sub> 2 <sub>1</sub> 2 | <i>P</i> 4 <sub>1</sub> 2 <sub>1</sub> 2 | <i>P</i> 4 <sub>1</sub> 2 <sub>1</sub> 2                                    |
| Cell constants                                      |                            |                                          |                                          |                                                                             |
| <i>a</i> , <i>b</i> , <i>c</i> (Å)                  | 88.5, 88.5, 647.6          | 119.2, 119.2, 212.6                      | 119.2, 119.2, 211.0                      | 119.4, 119.4, 210.7                                                         |
| $\alpha$ , $\beta$ , $\gamma$ (°)                   | 90, 90, 120                | 90, 90, 90                               | 90, 90, 90                               | 90, 90, 90                                                                  |
| Resolution (Å)                                      | 50–2.96<br>(3.01–2.96)     | 50–3.21<br>(3.27–3.21)                   | 50–2.75<br>(2.80–2.75)                   | 50–2.88<br>(2.93–2.88)                                                      |
| <i>R</i> <sub>sym</sub>                             | 0.204 (1.848)              | 0.144 (0.490)                            | 0.114 (0.678)                            | 0.136 (0.512)                                                               |
| <i>CC</i> <sub>1/2</sub>                            | (0.578)                    | (0.531)                                  | (0.886)                                  | (0.515)                                                                     |
| <i>I</i> / $\sigma$                                 | 29.0 (1.7)                 | 12.2 (2.8)                               | 30.7 (1.5)                               | 12.3 (2.1)                                                                  |
| Redundancy                                          | 69.8 (59.5)                | 15.5 (9.5)                               | 21.2 (11.3)                              | 16.2 (9.8)                                                                  |
| Completeness (%)                                    | 100 (100)                  | 99.7 (99.7)                              | 98.1 (87.5)                              | 99.9 (99.9)                                                                 |
| <b>Refinement</b>                                   |                            |                                          |                                          |                                                                             |
| Resolution (Å)                                      | 49.5–2.96                  | 48.5–3.20                                | 48.2–2.75                                | 48.2–2.88                                                                   |
| No. reflections                                     | 32,986                     | 25,689                                   | 39,494                                   | 35,058                                                                      |
| <i>R</i> <sub>work</sub> / <i>R</i> <sub>free</sub> | 0.266/0.298                | 0.237/0.285                              | 0.211/0.251                              | 0.206/0.249                                                                 |
| No. atoms                                           |                            |                                          |                                          |                                                                             |
| Protein                                             | 4,672                      | 6,417                                    | 6,398                                    | 6,514                                                                       |
| Ligand/ion                                          | 9                          | –                                        | 32                                       | 19                                                                          |
| <i>B</i> -factors (Å <sup>2</sup> )                 |                            |                                          |                                          |                                                                             |
| Protein                                             | 95.5                       | 81.0                                     | 89.9                                     | 66.6                                                                        |
| Ligand/ion                                          | 90.1                       | –                                        | 78.8                                     | 92.1                                                                        |
| Rmsds                                               |                            |                                          |                                          |                                                                             |
| Bond lengths (Å)                                    | 0.002                      | 0.002                                    | 0.002                                    | 0.002                                                                       |
| Bond angles (°)                                     | 0.516                      | 0.461                                    | 0.521                                    | 0.500                                                                       |
| Ramachandran plot                                   |                            |                                          |                                          |                                                                             |
| Favored (%)                                         | 96.4                       | 95.0                                     | 96.4                                     | 97.0                                                                        |
| Outliers (%)                                        | 0.0                        | 0.0                                      | 0.0                                      | 0.0                                                                         |

Highest-resolution shell is in parentheses.
