# Supplementary material
Source: PubMed Central journal article supplement (PMC7156963)

# Source Data for Figure 7

**D**

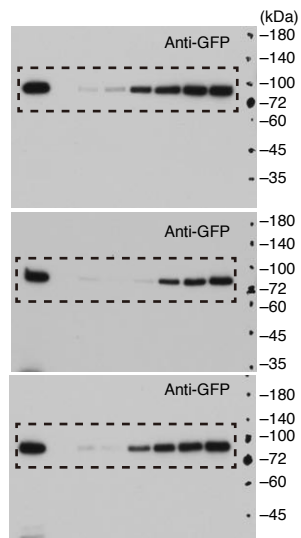

**E**

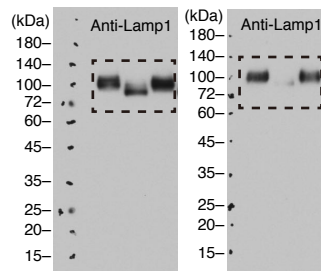

**F**

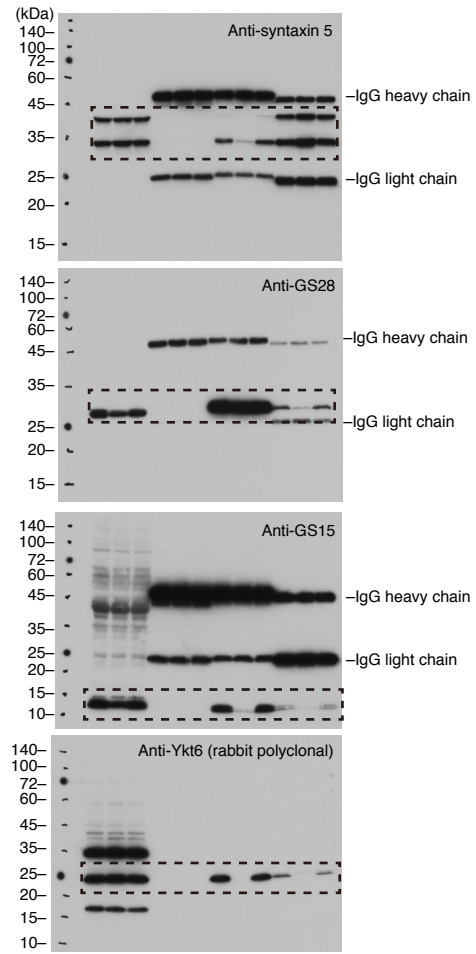

Supplement: EMBJ-39-e104120-s007.pdf [file EMBJ-39-e104120-s007.pdf]
